# Supplementary material for: High-performance asparagine-modified graphene oxide membranes for organic dyes and heavy metal ion separation
Source: Royal Society of Chemistry journal article supplement (doi:10.1039/d3nj04552h), 2023-12-15
Supplement: d3nj04552h1.pdf [file d3nj04552h1.pdf]

## Supporting Information

### **High-performance asparagine-modified graphene oxide membranes for organic dyes and heavy metal ions separation**

Ashique Hussain Jatoi<sup>1,†</sup>, Akbar Ali<sup>2,3,†</sup>, Ahmed Nadeem<sup>4</sup>, Shah Nawaz Phulpoto<sup>5</sup>, Muzaffar Iqbal<sup>6\*</sup>, Ayaz Ali Memon<sup>7</sup>, Jun Yang<sup>2,3\*</sup>, Khalid Hussain Thebo<sup>8\*</sup>

<sup>1</sup>*Department of Chemistry, Shaheed Benazir Bhutto University, Shaheed Benazirabad (67480), Pakistan*

<sup>2</sup>*State Key Laboratory of Multi-phase Complex Systems, Institute of Process Engineering (IPE), Chinese Academy of Sciences, Beijing 100F190, China*

<sup>3</sup>*University of the Chinese Academy of Sciences, 19A Yuquan Road, Beijing 100049, China*

<sup>4</sup>*Department of Pharmacology and Toxicology, College of Pharmacy, King Saud University, Riyadh 11451, Saudi Arabia*

<sup>5</sup>*Department of Molecular Biology & Genetics, Shaheed Benazir University, Shaheed Benazirabad 67480, Pakistan*

<sup>6</sup>*Department of Chemistry, Faculty of Physical and Applied Sciences, The University of Haripur (22620), KPK, Pakistan*

<sup>7</sup>*National Centre of Excellence in Analytical Chemistry, University of Sindh, Jamshoro, Pakistan*

<sup>8</sup>*Institute of Metal Research (IMR), Chinese Academy of Sciences, Shenyang (110016), China*

Corresponding Authors Email: [muzaffar.iqbal@uoh.edu.pk](mailto:muzaffar.iqbal@uoh.edu.pk) (M.I.)  
[jyang@ipe.ac.cn](mailto:jyang@ipe.ac.cn) (J.Y.)\*  
[khalidthebo@yahoo.com](mailto:khalidthebo@yahoo.com) (K. H. T.)\*  
† Equal Contribution

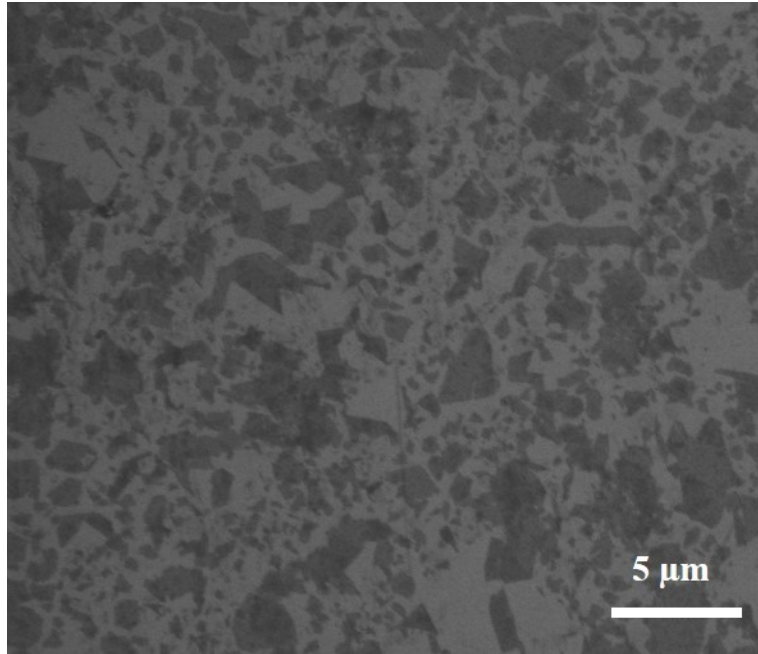

**Fig. S1** SEM studies and thickness of GO nanosheets.

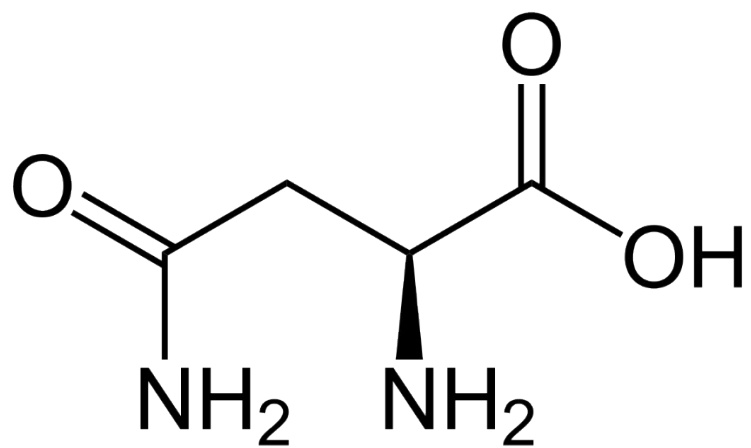

**Fig. S2** Molecular structure and functional groups of Asparagine amino acid

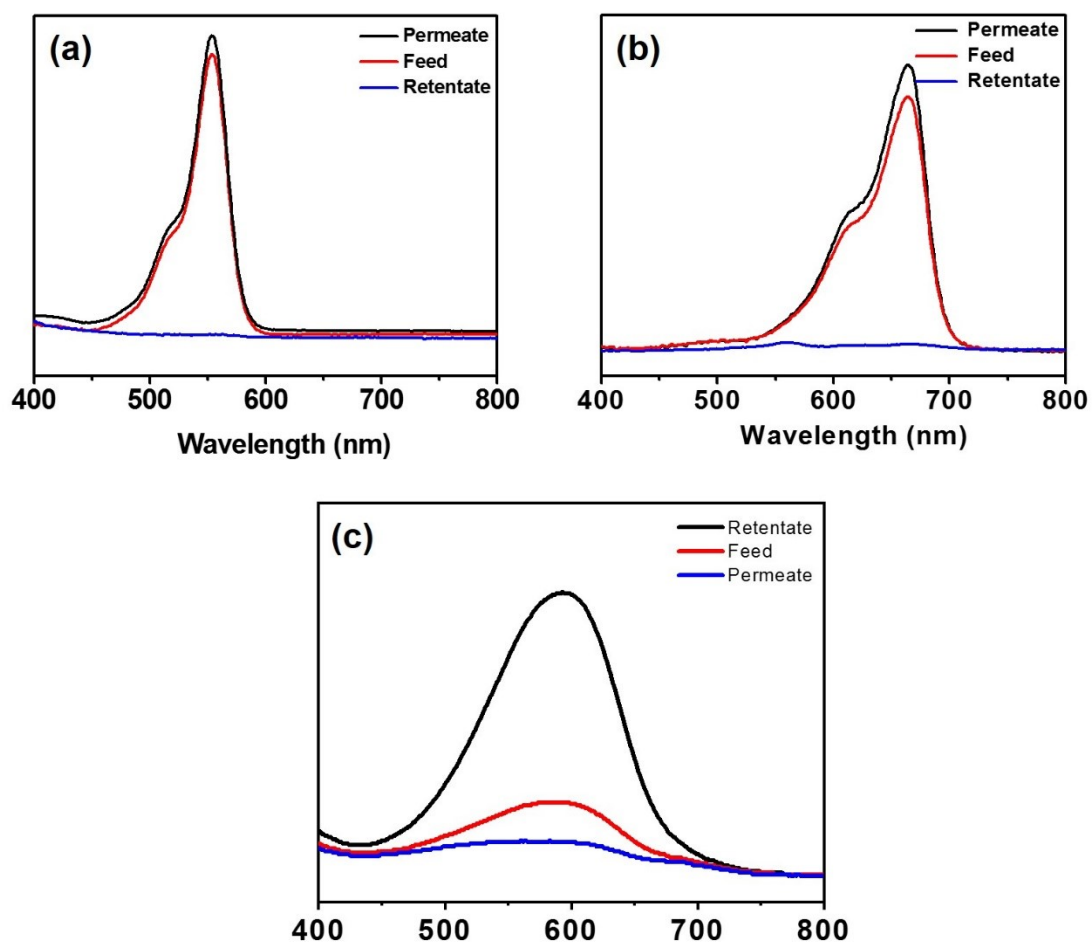

**Fig. S3** Ultraviolet-visible absorption spectra of the feed, retentate and permeate of (a) RB, (b) MLB and (c) MB solution after filtration by As@GO composite membrane ( $\sim 300 \pm 10$  nm).

**Table S1.** The equilibrium weight swelling ratio (ESR) of GO-based membranes in water.

| <b>Membranes</b>           | <b>DI Water</b> |
|----------------------------|-----------------|
| Pure GO membrane (320±10)  | 2.3± 0.1        |
| As@GO membrane (300±10 nm) | 0.8± 0.1        |
